1 **How to characterize a strain? The neglected influence of clonal heterogeneity on the**  
2 **phenotypes of industrial *Saccharomyces***

3 Hanna Viktória Rácz<sup>1,2</sup>, Fezan Mukhtar<sup>1</sup>, Alexandra Imre<sup>1,3</sup>, Zoltán Rádai<sup>4</sup>, Andreas Károly  
4 Gombert<sup>5</sup>, Tamás Rátonyi<sup>6</sup>, János Nagy<sup>6</sup>, István Pócsi<sup>1</sup>, Walter P. Pfliegler<sup>1</sup>

5 <sup>1</sup>Department of Molecular Biotechnology and Microbiology, University of Debrecen,  
6 Debrecen, Egyetem tér 1., 4032 Hungary.

7 <sup>2</sup>Doctoral School of Nutrition and Food Sciences, University of Debrecen, Debrecen,  
8 Egyetem tér 1., 4032 Hungary.

9 <sup>3</sup>Kálmán Laki Doctoral School of Biomedical and Clinical Sciences, University of Debrecen,  
10 Debrecen, Egyetem tér 1., 4032 Hungary.

11 <sup>4</sup>MTA-ÖK Lendület Seed Ecology Research Group, Institute of Ecology and Botany, Centre  
12 for Ecological Research, Vácrátót, Alkotmány út 2-4., 2163 Hungary.

13 <sup>5</sup>School of Food Engineering, Universidade Estadual de Campinas, Rua Monteiro Lobato 80,  
14 Campinas, SP, 13083-862 Brazil.

15 <sup>6</sup>Institute of Land Use, Technology and Regional Development, University of Debrecen,  
16 Debrecen, Egyetem tér 1., 4032 Hungary.

17

18 \*Corresponding author: Walter P. Pfliegler

19 Email: [pfliegler.valter@science.unideb.hu](mailto:pfliegler.valter@science.unideb.hu)

20

## 21 **Abstract**

22 Populations of microbes are constantly evolving heterogeneity that selection acts upon, yet  
23 heterogeneity is non-trivial to assess methodologically. The practice of isolating single cell  
24 colonies for establishing, transferring, and using a strain results in single-cell bottlenecks with  
25 a generally neglected effect on the characteristics of the strain. We used six industrial yeasts  
26 to assess the level of heterogeneity in clonal populations, especially in terms of stress  
27 tolerance. First, we uncovered the existence of genome structure variants in available  
28 sequenced genomes of clonal lineages of these strains. Subsequent phenotyping of strains and  
29 their newly isolated subclones showed that single-cell bottlenecks during isolation can  
30 considerably influence the observable phenotype. Next, we decoupled fitness distributions on  
31 the level of individual cells from clonal interference by plating single cell colonies. We used  
32 the obtained data on colony area for statistical modeling of the heterogeneity in phenotypes.  
33 One strain was further used to show how individual subclonal lineages are remarkably  
34 different not just in phenotype, but also in the level of heterogeneity. Thereby we call  
35 attention to the fact that choosing an initial clonal lineage from an industrial yeast strain may  
36 vastly influence downstream performances and observations on geno- and phenotype, and  
37 also on heterogeneity.

38

## 39 **Introduction**

40 Yeasts have played an important role in human societies since their ancient domestication.  
41 Their biochemical versatility, tolerance to a wide range of stress factors, and the ease of  
42 applying traditional and later molecular strain improvement strategies have only increased  
43 their roles in many agricultural and industrial fields (Gallone *et al.* 2016; Gonçalves *et al.*  
44 2016; Barbosa *et al.* 2018; Peter *et al.* 2018; Steensels *et al.* 2019). This industrial  
45 applicability is most pronounced in the species *Saccharomyces cerevisiae* that has become  
46 unsurmountable in the production of leavened bread, alcoholic beverages, bioethanol, and in  
47 modern biotechnology, while also being widely utilized in fields like bioprotection, or food  
48 and feed supplements (Legras *et al.* 2007; Peter *et al.* 2018). The species is not merely utilized  
49 for industrial fermentations, but may be part of the human microbiome or be used as a  
50 probiotic (under the taxonomically obsolete name *S. boulardii*), while in some cases, it also  
51 has been reported as an opportunistic human pathogen (Peter *et al.* 2018). Importantly,  
52 colonizing and infectious isolates are often derived from commercial probiotic or baking

53 strains, or are known to be members of the wine yeast clade (Zhu, Sherlock and Petrov 2016;  
54 Pfliegler *et al.* 2017; Peter *et al.* 2018; Imre *et al.* 2019).

55 *S. cerevisiae* is known to be a genetically diverse species with dozens of globally distributed  
56 or endemic phylogenetic clades, many of which show hallmarks of domestication. A number  
57 of clades have become adapted to the production of fermented beverages or foods and these  
58 are regarded as prime examples of microbe domestication that quite often led to the existence  
59 of polyploid and/or aneuploid lineages (Strope *et al.* 2015; Gallone *et al.* 2016; Duan *et al.*  
60 2018; Peter *et al.* 2018; Steensels *et al.* 2019). The most widespread yeast-fermented product  
61 worldwide that uses another yeast „species” is lager beer, where fermentation is carried out by  
62 domesticated hybrids of *S. cerevisiae* and *S. eubayanus* (known as *S. pastorianus* and *S.*  
63 *carlsbergensis*) (Gallone *et al.* 2019; Langdon *et al.* 2019; Salazar *et al.* 2019).

64 The key factors in *S. cerevisiae* becoming so ubiquitous in human-made environments are  
65 improved fermentation characteristics, including the utilization of various sugars and  
66 production of aroma components (Steensels *et al.* 2019; Pontes *et al.* 2020), stress tolerance,  
67 and elevated adaptability (e.g. Yue *et al.* 2017; Peter *et al.* 2018; Tattini *et al.* 2019). The  
68 species is not merely capable of coping with various stress factors found under industrial  
69 circumstances, but it also very quickly adapts to changing environments, a trait of utmost  
70 importance in the fluctuating environments of various alcoholic fermentations.  
71 *Saccharomyces* species are sexual yeasts, able to utilize meiotic recombination to enhance  
72 genetic variability to facilitate adaptation (Mortimer 2000; McDonald, Rice and Desai 2016).  
73 However, during most industrial processes, yeasts reproduce mitotically. These clonal  
74 populations, however, retain their ability to generate novel variants for selection to act upon,  
75 in the form of mutations and genome structure variations (GSV). The latter include ploidy  
76 changes, aneuploidies/chromosome copy number variations, loss-of-heterozygosity (LOH),  
77 gross chromosomal rearrangements (GCR) and mitotic crossing overs (e.g. van den Broek *et*  
78 *al.* 2015; e.g. Zhu, Sherlock and Petrov 2016; Peter *et al.* 2018). These phenomena can alter  
79 their industrial performance and may happen very rapidly (Zhang *et al.* 2016; Kadowaki *et al.*  
80 2017; Morard *et al.* 2019; Gorter de Vries *et al.* 2020; Large *et al.* 2020). Along with point  
81 mutations, these GSV events result in clonal populations gradually accumulating differences  
82 in various traits, leading to clonal heterogeneity, clonal interference (competition among  
83 isogenic asexual lineages) and hence the emergence of so-called subclonal lineages,  
84 reminiscent of the experimental evolution setups conducted with laboratory strains (e.g. Lang,  
85 Botstein and Desai 2011; Payen *et al.* 2016; Blundell *et al.* 2018; Large *et al.* 2020). These

86 evolving and competing subclones ultimately determine the fitness and the performance of the  
87 industrial strains during technological applications. Clonal interference may later be alleviated  
88 by sexual reproduction, but only if the yeasts survive the technological processes and are able  
89 to re-colonize the fermentation environment, as happens in traditional wineries (Mortimer  
90 2000; Magwene 2014). Most modern technological protocols, however, completely remove  
91 the applied yeast populations, either immediately or after a limited number of repitchings  
92 (Large *et al.* 2020), and new fermentations are carried out with fresh inocula from established  
93 propagation companies, e.g. starter cultures in wineries (Ciani *et al.* 2016) or beer yeast  
94 starters (Large *et al.* 2020).

95 In spite of the considerations above, a yeast strain is in general treated as a uniform entity,  
96 both in studies aiming at assessing the diversity and characteristics of the species, and in the  
97 commercialization and handling of industrial starter yeasts. In fact, strains are by definition  
98 genetically uniform microbial cultures. These strains, upon transfer from one lab to another,  
99 or even before each experimental round in the same lab, are conventionally spread on agar  
100 media to isolate genuine single-cell colonies void of any potential contaminants. Single cell  
101 colonies are conventionally considered to be genetically identical (e.g. Eyler 2013) and even  
102 in experimental evolution setups, heterogeneity is only considered after the start of the  
103 experiment (for a review on ale and lager experimental evolution, see Gibson *et al.* 2020). In  
104 the present study, we aimed to investigate whether the wide-spread process of isolating  
105 single-cell colonies (subclones) from commercial yeast products and from strains in  
106 collections has a hitherto neglected effect on the observable geno- and phenotype of these  
107 strains. In particular, as industrial yeasts are propagated en masse (under relatively stressful  
108 conditions) by companies producing and packaging them for dozens of generations (Qiu *et al.*  
109 2019; Large *et al.* 2020), we hypothesized that standing genetic variation and clonal  
110 heterogeneity stemming from mutations and genome structure variations may already be  
111 present in commercial products and may have considerable effects on the phenotypes of  
112 industrial yeast. We also assumed that such a diversity in subclone lineages may confer  
113 plasticity to the industrial yeast population as a whole, manifesting in clonal phenotypic  
114 heterogeneity. Heterogeneity may presumably cause unpredictable biases to geno- and  
115 phenotypic studies involving yeast lineages that need to be isolated from products, whether  
116 for basic research, for strain improvement, or for health issues (compare to Pfliegler *et al.*  
117 2017; Large *et al.* 2020).

118 To observe and compare heterogeneity, we used wine, ale, lager, probiotic, and bread yeasts  
119 of various ploidies to study how heterogeneous these yeasts are when colony phenotypes and  
120 stress tolerance are considered. Using a baker's yeast sample, we assessed how even a single  
121 population bottleneck, namely the first instance of single-colony isolation, may considerably  
122 influence the observed phenotypic characteristics and also the observable clonal heterogeneity  
123 of a given strain. Additionally, we discuss that recent genomic studies of yeasts occasionally  
124 investigated very different subclone lineages from a single strain, corroborating the  
125 widespread nature of heterogeneity in industrial lineages.

126

## 127 **Materials and Methods**

128 Strains and (sub)culturing.

129 We obtained commercially available ale, bakery, bioethanol, lager, probiotic, and wine yeasts  
130 (Table 1.) and pre-cultured the products in YPD medium (VWR, Radnor, PA, USA) for 30  
131 min at room temperature. The bioethanol PE-2 strain was also obtained from NCYC, and the  
132 supplier's protocol was followed for reviving. These cultures were immediately used to  
133 isolate 12 subclone lineages from each yeast, which were designated with letters from 'a' to  
134 'l'.

| Strain name used in this study | Other names                                                                                    | Origin of cultures in this study                                                       | Genomes analyzed in this study and their origins   |                |             |                                                               |                                                                       |
|--------------------------------|------------------------------------------------------------------------------------------------|----------------------------------------------------------------------------------------|----------------------------------------------------|----------------|-------------|---------------------------------------------------------------|-----------------------------------------------------------------------|
|                                |                                                                                                |                                                                                        | BioSample                                          | SRA Experiment | SRA Run     | Coverage (calculated for haploid <i>S. cerevisiae</i> genome) | Reference                                                             |
| ADY_Baker                      | Commercial name                                                                                | Commercial vendor, Hungary, manufactured in Germany, producer undisclosed by vendor    | SAMN15579325 (subclone 1)                          | SRX8770000     | SRR12264806 | 43.0                                                          | This study                                                            |
|                                |                                                                                                |                                                                                        | SAMN15579326 (subclone 2)                          | SRX8770001     | SRR12264805 | 51.5                                                          | This study                                                            |
| Ale                            | Commercial name                                                                                | Commercial vendor, Hungary, manufactured in France by a subsidiary of a French company | SAMEA3895632 (isolate sequenced by Peter et al.)   | ERX1380630     | ERR1309393  | 30.1                                                          | (Peter <i>et al.</i> 2018)                                            |
|                                |                                                                                                |                                                                                        | SAMN10973883 (isolate sequenced by Langdon et al.) | SRX6781686     | SRR10047300 | 33.8                                                          | (Langdon <i>et al.</i> 2019)                                          |
|                                |                                                                                                |                                                                                        | SAMN10375233 (isolate sequenced by Fay et al.)     | SRX4993536     | SRR8173067  | 14.9                                                          | (Fay <i>et al.</i> 2019)                                              |
| Bioethanol                     | PE-2; NCYC 3233, JAY270 (JAY270 is a pure culture isolate derived from a PE2 commercial stock) | NCYC (National Collection of Yeast Cultures)                                           | SAMN04965971 (JAY270 subclone)                     | SRX2038376     | SRR4047520  | 102.7                                                         | (Rodrigues-Prause <i>et al.</i> 2018)                                 |
|                                |                                                                                                | Commercial vendor, Brazil, manufactured in Brazil                                      | SAMN15559291 (product subclone 1)                  | SRX8748432     | SRR12240130 | 42.3                                                          | This study                                                            |
|                                |                                                                                                | Commercial vendor, Brazil, manufactured in Brazil                                      | SAMN15559292 (product subclone 2)                  | SRX8748433     | SRR12240129 | 30.1                                                          | This study                                                            |
|                                |                                                                                                | Commercial vendor, Brazil, manufactured in Brazil                                      | SAMN15559293 (product subclone 3)                  | SRX8748434     | SRR12240128 | 27.4                                                          | This study                                                            |
| Lager                          | Weihenstephan 34/70                                                                            | Commercial vendor, Hungary, manufactured in France by a subsidiary of a French company | SAMN03174146 (isolate A1)                          | SRX758144      | SRR1649183  | 71.0                                                          | (van den Broek <i>et al.</i> 2015)                                    |
|                                |                                                                                                |                                                                                        | SAMN03174146 (isolate A2)                          | SRX758149      | SRR1649191  | 87.3                                                          | (van den Broek <i>et al.</i> 2015)                                    |
|                                |                                                                                                |                                                                                        | SAMN03174146 (isolate A1+B11)                      | SRX758145      | SRR1649190  | 48.2                                                          | (van den Broek <i>et al.</i> 2015)                                    |
|                                |                                                                                                |                                                                                        | SAMD00035489 (isolate sequenced by Okuno et al.)   | DRX036594      | DRR040651   | 430.9                                                         | (Okuno <i>et al.</i> 2016), also used in (Langdon <i>et al.</i> 2019) |
|                                |                                                                                                |                                                                                        | SAMN10375239 (isolate sequenced by Fay et al.)     | SRX4993613     | SRR8172990  | 23.9                                                          | (Fay <i>et al.</i> 2019)                                              |
| Probiotic                      | Commercial name                                                                                | Commercial vendor, Hungary, manufactured in Hungary                                    | SAMN11634143                                       | SRX5874542     | SRR9099591  | 256.8                                                         | (Offei <i>et al.</i> 2019)                                            |

|      |                 |                                                                                                |              |            |            |      |                               |
|------|-----------------|------------------------------------------------------------------------------------------------|--------------|------------|------------|------|-------------------------------|
|      |                 | with licence from a Canadian company                                                           |              |            |            |      |                               |
| Wine | Commercial name | Commercial vendor (Hungary), manufactured in Switzerland by a subsidiary of a Canadian company | SAMN04286169 | SRX1457336 | SRR2967887 | 20.2 | (Borneman <i>et al.</i> 2016) |

136 Table 1. Strains used in this study, with accession numbers for whole genome sequencing  
137 data.

138

139 Whole-genome sequencing and ploidy determination.

140 Whole-genome analysis involved previously sequenced genomes downloaded from NCBI  
141 SRA. For the Lager and Ale strain, multiple lineages have been sequenced in recent studies,  
142 and these were compared (Table 1.). In the case of the ADY\_Baker yeast two subclones from  
143 a product commercially obtained in Hungary were newly sequenced at the core facility of the  
144 University of Debrecen: one typical colony, and one smaller, rough phenotype colony (named  
145 subclone 1 and subclone 2, respectively). These lineages were subcultured only once  
146 (multiple single-cell bottlenecks were avoided) and were saved as stocks at  $-70^{\circ}\text{C}$ . Genomic  
147 DNA was isolated from the lineages after 24 h growth of the cultures following inoculation in  
148 the form of a streak on YPD agar from stocks stored at  $-70^{\circ}\text{C}$ . DNA isolation followed  
149 Hanna and Xiao (2006). Library preparation was performed using tagmentation with the  
150 Nextera DNA Flex Library Prep kit (Illumina, San Diego, CA, USA) according to the  
151 manufacturer's protocol, sequencing was performed using 150 bp paired-end reads on an  
152 Illumina NextSeq 500 system, with approximately  $50\times$  coverage of the nuclear genome.  
153 Altogether three subclones of the Bioethanol strain, obtained from a commercial product in  
154 Brazil in active dry yeast form, containing yeast PE-2, were isolated and sequenced at the  
155 Bauer Core, Harvard University, Cambridge, MA, using Illumina NextSeq\_High 150 paired-  
156 end reads. Genomic DNA for these samples was extracted using an in-house protocol, library  
157 preparation was carried out using an adapted tagmentation and Nextera kit from Illumina  
158 (Baym *et al.* 2015). Raw reads were deposited to NCBI SRA under BioProject  
159 PRJNA646688.



160 Newly generated FASTQ sequencing files along with those obtained from SRA were trimmed  
161 and filtered using fastp (Chen *et al.* 2018), and mapped to the S288C reference genome  
162 (R64.2.1.) downloaded from the SGD database (yeastgenome.org) and the reference genomes  
163 of the other *Saccharomyces* species (Scannell *et al.* 2011) concatenated to it, using bwa  
164 0.7.17. (Li and Durbin 2009). We only used single runs and single experiments for each SRA  
165 genome to avoid any effect of clonal heterogeneity in biosamples with multiple available  
166 experiments. Sorted BAM files were obtained using samtools 1.7. (Li *et al.* 2009) and Picard-  
167 tools 1.124. (<http://picard.sourceforge.net>) was used to mark duplicated reads. Local  
168 realignment around indels and joint variant calling and filtering for the six samples were  
169 performed with GATK 4.1.6.0 (Van der Auwera *et al.* 2013; Poplin *et al.* 2018) with regions  
170 annotated in the SGD database as simple repeats, centromeric regions, telomeric regions, or  
171 LTRs excluded. First, genomic VCF files were obtained, joint calling was applied, and in the  
172 resulting VCF files, only SNPs were selected. SNPs were filtered according to the parameters  
173 used by (Fay *et al.* 2019): QD < 5.0; QUAL < 30.0; SOR > 3.0; FS > 60.0; MQ < 40.0;  
174 MQRankSum < -12.5; ReadPosRankSum < -8.0; --set-filtered-genotype-to-no-call true.  
175 Subsequently, biallelic SNPs that were heterozygous in the individual strains were selected  
176 and exported to a .csv file using the query option of BCFtools 1.10.2. Here, only those sites  
177 were selected that had an allele to allele ratio  $\geq 0.2$  and at the same time showed an AD value  
178 not smaller than one fifth of the strain's average coverage. Allele frequency plots were  
179 obtained from these. Allele frequencies were used to estimate ploidy following Zhu *et al.*  
180 (2016), with the assumptions that diploids have allele ratios of approx. 1:0 or 1:1, triploids of  
181 1:0, 1:2, and 2:1, tetraploids of 1:0, 1:3, 1:1, or 3:1, etc. These ploidy and chromosome copy  
182 number variation (CCNV) results obtained from allele ratios were compared to coverage plots  
183 and coverage ratios generated by the software Y<sub>MAP</sub> using chromosome end and GC content  
184 bias correction (Abbey *et al.* 2014). In the case of the hybrid W34/70 lager genome, we  
185 created a hybrid reference in Y<sub>MAP</sub> to be able to represent the strain with the same method as  
186 well. Results were compared to previous literature on the given strains' ploidies where  
187 available, for Ale (Peter *et al.* 2018; Fay *et al.* 2019; Langdon *et al.* 2019), Bioethanol  
188 (Rodrigues-Prause *et al.* 2018), and Lager strains (van den Broek *et al.* 2015; Okuno *et al.*  
189 2016; Fay *et al.* 2019). Called VCF files were uploaded to FigShare (doi:  
190 10.6084/m9.figshare.12673250).

191

192 Multiplex PCR.



193 We performed our recently developed interdelta and microsatellite fingerprinting multiplex  
194 PCR method to rule out that the subclones obtained from products are contaminations that do  
195 not correspond to the actual strain. Briefly, we combined interdelta, microsatellite (*YLR177w*,  
196 *YOR267c*), and as a control, ITS 1-4 primer pairs in a single PCR reaction (Imre *et al.* 2019).  
197 Then, after gel electrophoresis we compared the strains to the derived subclones to identify  
198 band patterns that could indicate the presence of isolates other than the original strain.

199

200 Colony morphology and petite test.

201 Heterogeneity in colony morphologies (colony phenotype switch) and frequency of *petite*  
202 mitochondrial mutants in packed products were assessed by plating samples directly after the  
203 first pre-culturing (as described above) onto YPD agar plates (for colony morphologies) and  
204 onto GlyYP (glycerol yeast extract peptone) + 0.1% glucose agar plates with cell densities of  
205 approx. 200/plate (after cell counting in a haemocytometer). Plates were incubated for 10 days  
206 at 30°C (with agar surface facing down) and were visually scored for various phenotypes on  
207 YPD (rough, wrinkled, sectored, stalk-like, and very small colonies) and for potential petite  
208 mutants on GlyYP. Presumed petites were transferred to YPD and after overnight culturing,  
209 were inoculated onto GlyYP plates without glucose. Subclones unable to grow on glucose-  
210 free GlyYP were scored as petites. Finally, YPD colonies were washed under tap water to  
211 determine the frequency of invasivity into agar. At least 1,000 subclone colonies were  
212 counted for each strain and for each assay, raw data was uploaded to FigShare (doi:  
213 10.6084/m9.figshare.12673256).

214

215 Spot-plate assays.

216 Tolerance to various stress factors with a focus on industrially relevant stresses (Gibson *et al.*  
217 2007; Qiu *et al.* 2019) and growth on rich and minimal media were assessed using the spot-  
218 plate method for all strains and all subclones of the strains. The following stress media based  
219 on SD (synthetic defined, 2% glucose, 0.67% yeast nitrogen base without amino acids) were  
220 used: ethanol and high sugar osmotic stress (Bioethanol, Ale, Lager, Wine yeasts), NaCl and  
221 high sugar osmotic stress (ADY\_Baker), and salt and oxidative stress (H<sub>2</sub>O<sub>2</sub>) media for the  
222 Probiotic yeast. In preliminary experiments, we determined the optimal concentrations of

223 stressors that may enable differentiating between subclone lineages (Table S1.). Samples  
224 grown overnight (30°C) on YPD plates were washed in ddH<sub>2</sub>O, prepared in equal cell  
225 concentrations after cell counting with a haemocytometer, and spotted in 10 µl drops in a  
226 series of approx. 50,000; 5,000; 500; 50; and 5 cells to the various plates. The samples  
227 originating from the initial isolations were briefly stored at 4°C, single-cell bottlenecks were  
228 avoided as described above. Plates were incubated at 30°C for 2 days before photographing  
229 them using a DSLR camera. Growth was evaluated visually, plate photographs were uploaded  
230 to FigShare (doi: 10.6084/m9.figshare.12673253).

231

232 Clonal heterogeneity test.

233 Clonal heterogeneity under stress was assessed by using the same stress conditions as in the  
234 spot plate assays, supplemented with assays on SD and YPD media. Freshly grown cells (as  
235 described for spot plates) were counted in a haemocytometer and spread to land about 200  
236 cells/plate. Plates were incubated at 30°C for 2 days (YPD and SD media), or for 2, 3, 4, and  
237 6 days (stress media) as colonies reached sizes that were visible but not yet close to each  
238 other. For each condition, three replicate plates were used for each sample. Photographs were  
239 taken 4 and 6 days after inoculation with a DSLR camera. Data on colony area was gathered  
240 by using the Fiji software package CountPHICS (Brzozowska *et al.* 2019) with circularity set  
241 to 0.8. Pixel to mm ratios were measured and area calculations were randomly verified by  
242 manual measurement in ImageJ for altogether ten colonies (Rueden *et al.* 2017). Plate  
243 photographs and all colony area values were uploaded to FigShare (doi:  
244 10.6084/m9.figshare.12673256).

245

246 Statistical analysis of clonal heterogeneity data.

247 Analyses were done in the R environment for statistical computing (R Core Team 2020). Prior  
248 to analyzes, colony size data were square root-transformed to bring value distributions closer  
249 to Gaussian; also, following square root transformation, data were re-scaled by carrying out z-  
250 score transformation (i.e. subtracting variable mean from all values, then dividing by standard  
251 deviation) to aid model fitting in later analyzes. We used linear regression modelling of  
252 Bayesian approach, utilizing the R-package “MCMCglmm” (Hadfield 2010), because it

253 allows for flexible model specifications, and estimates are less sensitive to group size  
254 differences than ordinary least squares methods. Firstly, to test how heterogeneity was  
255 dependent on growth conditions across the different strains we fitted a model with the re-  
256 scaled colony area measurements as response variable, and specific grouping variable  
257 accounting for both strain and growth condition (i.e. practically controlling for strain,  
258 condition, and the interaction of these, without including empty factor levels, i.e. untested  
259 strain-condition pairs) as fixed predictor. Model specification was done in a way so that  
260 group-level residual variances could be estimated. Because measurements originated from  
261 Petri dish repeats, and colonies within Petri dishes were of common origin, we included  
262 repetition ID nested within strain as random effect to control for non-independence in the  
263 data. In the results we assessed growth condition related differences in group heterogeneities  
264 by contrasting posterior distributions of residual variance estimates. Statistical significance  
265 was established by using 95% highest posterior density (HPD) intervals (analogous to  
266 confidence intervals in frequentist modelling): for contrast estimates where the 95% HPD  
267 interval did not cross zero, the difference between the contrasted groups is considered to be  
268 statistically significant.

269 Secondly, when testing how subclones differ in colony area heterogeneity from their original  
270 sample under salt stress, two separate models were fitted, using data from 4 days and 6 days  
271 of incubation. This separate analysis for 4 and 6 days data was necessary because of the non-  
272 independence in the data due to the temporal correlation between the measures carried out at  
273 day 4 and 6. Since we did not want to test the effect of time (4 *versus* 6 days), and  
274 measurements of day 6 inherently depend on (are correlated with) measurements on day 4,  
275 using separate models was preferable to more complicated model specifications. We note here  
276 that it is possible that a single or multiple subclone lineages within a single colony may  
277 appear and quickly invade a sector in a colony, resulting in an asymmetrically growing  
278 sectorized colony. In such a case, day 6 measurements would not inherently depend on day 4  
279 measurements. However, sectorized colonies were found to be very rare even after 10 days of  
280 incubation, thus their hypothetical effects can be ignored here. In these models square root-  
281 and z-score transformed colony size was the response variable, and strain was fixed predictor.  
282 Because we wanted to compare heterogeneities of subclone lineages with that of the  
283 commercial ADY\_Baker product, in the models residual variances of groups were estimated  
284 for strains separately. Similarly to the above described model, repetition ID nested within  
285 sample was used as random effect. In the results we report posterior distributions of contrast

286 parameters for residual variance estimates compared between subclones and the initial  
287 commercial sample.

288 For all models weakly informative proper priors were specified; for random effect variances  
289 parameter expanded priors were used to aid mixing of the Markov chains for random effect  
290 variances. During model fitting, sampling of the posterior distributions were run for 105,000  
291 iterations, from which the first 5,000 were discarded as “burn-in”, and from the Markov chain  
292 Monte Carlo (MCMC) process only every 50<sup>th</sup> samples were retained (called thinning  
293 interval), yielding a nominal sample size for parameter estimate posterior distributions equal  
294 to 2,000. Model diagnostics included visual checking of MCMC chains for trends in the chain  
295 trajectories (plotting MCMC samples in the order of iterations), and calculation of  
296 autocorrelation in the MCMC chains at lag of the thinning interval (MCMC chains were  
297 considered to be mixing well if absolute value of estimated autocorrelation coefficient was  
298 lower than 0.1).

299

## 300 **Results**

301 Industrial yeast samples and ploidy.

302 In this study, we obtained probiotic, ale, lager, wine, bioethanol, and baking (active dry)  
303 yeasts from commercial vendors. Five of these samples belong to strains with sequenced  
304 genomes, while the ADY\_Baking yeast was sequenced and analyzed in this study for the first  
305 time. The genomes of the Probiotic, Bioethanol, and Wine yeast were euploid. The  
306 ADY\_Baker was euploid tetraploid or aneuploid diploid, depending on the subclone lineage  
307 (two of which were sequenced). The Ale and Lager yeast showed previously described  
308 extensive aneuploidies, however, these were not identical when different studies were  
309 compared and genomes from these were re-analyzed for aneuploidies (Table 2., Figure S1.).  
310 Furthermore, strains with multiple sequenced sublineages showed various conspicuous runs of  
311 homozygosity (ROH) as well as intrachromosomal changes in coverage pointing to GCR  
312 events that often differed between subclones, especially in the case of the Lager yeast (Figure  
313 S1.).

314

315

| Strain     | Ploidy                           | Aneuploidy found via genome analysis or described in literature                                                                                                                                                                                                                                                                                                                                                                                                                                                                                                                                                                                                                                                                                                                                                                                                                                                                                                                                                                                                                                                                                                                                                                                                    |
|------------|----------------------------------|--------------------------------------------------------------------------------------------------------------------------------------------------------------------------------------------------------------------------------------------------------------------------------------------------------------------------------------------------------------------------------------------------------------------------------------------------------------------------------------------------------------------------------------------------------------------------------------------------------------------------------------------------------------------------------------------------------------------------------------------------------------------------------------------------------------------------------------------------------------------------------------------------------------------------------------------------------------------------------------------------------------------------------------------------------------------------------------------------------------------------------------------------------------------------------------------------------------------------------------------------------------------|
| ADY Baker  | 4 (subclone 1)<br>2 (subclone 2) | no (subclone 1) (This study)<br>yes, also complex rearrangements (subclone 2) +1 I, VI, IX (This study)                                                                                                                                                                                                                                                                                                                                                                                                                                                                                                                                                                                                                                                                                                                                                                                                                                                                                                                                                                                                                                                                                                                                                            |
| Ale        | 4 (all samples)                  | yes<br>+1 VI; -1 I, V, XII (Peter <i>et al.</i> 2018)<br>-1 I, V (Fay <i>et al.</i> 2019)<br>+1 I; +2 VI; -1 XVI (Langdon <i>et al.</i> 2019)                                                                                                                                                                                                                                                                                                                                                                                                                                                                                                                                                                                                                                                                                                                                                                                                                                                                                                                                                                                                                                                                                                                      |
| Bioethanol | 2 (all samples)                  | no (Rodrigues-Prause <i>et al.</i> 2018; This study)                                                                                                                                                                                                                                                                                                                                                                                                                                                                                                                                                                                                                                                                                                                                                                                                                                                                                                                                                                                                                                                                                                                                                                                                               |
| Lager      | 2+2 hybrid (all samples)         | yes, also chromosome segment losses<br><br>+1 from <i>S. cerevisiae</i> II, VII, VIII, X, XI, XIV, XV, hybrid III, <i>S. eubayanus</i> VI; +2 from <i>S. cerevisiae</i> IX; -1 from <i>S. cerevisiae</i> I, VI, <i>S. eubayanus</i> IX, X, XV+VIII (A1 van den Broek <i>et al.</i> , 2015)<br><br>+1 from <i>S. cerevisiae</i> II, IV, V, VIII, X, XI, XII, XIII, XIV, XV, XVI, <i>S. eubayanus</i> X; +2 from hybrid III; +3 from <i>S. cerevisiae</i> IX; -1 from <i>S. cerevisiae</i> III, <i>S. eubayanus</i> I, IX, XV+VIII (A1+B11 of van den Broek <i>et al.</i> , 2015)<br><br>+1 from <i>S. cerevisiae</i> II, IV, VII, X, XI, XIII, XIV, XV, hybrid III, <i>S. eubayanus</i> VI; +2 from <i>S. cerevisiae</i> VIII, IX; -1 from hybrid VII, <i>S. eubayanus</i> IX, X (A2 van den Broek <i>et al.</i> , 2015)<br><br>+1 <i>S. cerevisiae</i> II, IV, VII, XIII, XIV, XV, XVI, <i>S. eubayanus</i> VI; +2 <i>S. cerevisiae</i> VIII, IX, hybrid III; -1 <i>S. eubayanus</i> II, IX, X (Fay <i>et al.</i> 2019)<br><br>+1 from <i>S. cerevisiae</i> I, II, IV, VI, X, XI, XIII, XVI, <i>S. eubayanus</i> I; +2 from <i>S. eubayanus</i> VI; +3 from <i>S. cerevisiae</i> IX, hybrid III; -1 from <i>S. eubayanus</i> IV, X, XVI (Okuno <i>et al.</i> 2016) |
| Probiotic  | 2                                | no                                                                                                                                                                                                                                                                                                                                                                                                                                                                                                                                                                                                                                                                                                                                                                                                                                                                                                                                                                                                                                                                                                                                                                                                                                                                 |
| Wine       | 2                                | no                                                                                                                                                                                                                                                                                                                                                                                                                                                                                                                                                                                                                                                                                                                                                                                                                                                                                                                                                                                                                                                                                                                                                                                                                                                                 |

316 **Table 2.** Ploidy and aneuploidies of yeast samples, as found in re-analyzed sequenced  
 317 genomes and via comparison with literature. Chromosome copy number variations do not  
 318 include partial (less than half of a chromosome) extra or lost copies arising from segmental  
 319 duplications or other GCRs which are especially common in the Lager yeasts.

320

321 Heterogeneity of colony phenotypes in commercial yeast products.

322 We determined heterogeneity in colony morphology, invasivity, and *petite* frequency in the  
 323 industrial yeast strains directly, without subculturing the actual product. We found remarkably  
 324 variable colony phenotypes (Table 3., Figure 1.) and at the same time, large variability in the  
 325 fraction of atypical colonies, ranging from 0.78% of variable morphologies (Bioethanol) to as  
 326 much as 27.36% in the Ale yeasts. In the case of the Ale strain, wrinkled and conspicuously  
 327 small colonies were the most prevalent. Stalk-like colonies (Figure 1.: m) were observed,  
 328 although with negligible frequencies, in four of the six strains. Proportion of invasivity among  
 329 the colonies ranged between 0.31% (Bioethanol) and 34.62% (ADY\_Baking), and various  
 330 types of invasive growth could be observed among the samples. Especially in the case of the  
 331 ADY\_Baking and the Probiotic yeast, different invasive phenotypes co-occured. In the case

332 of the Bioethanol strain, rough morphology and invasiveness always co-occurred; in other  
 333 strains, such a clear link was not observed between these traits. Frequency of *petites* reached  
 334 more than 1% only in the case of the Ale yeast (Table 3.).

| Strain     | Wrinkled curled | Rough undulate | Sectored | Small | Stalk-like | Invasive | <i>petite</i> |
|------------|-----------------|----------------|----------|-------|------------|----------|---------------|
| ADY_Baking | 0%              | 0.72%          | 0.72%    | 1.22% | 0.14%      | 34.62%   | 0.00%         |
| Ale        | 13.98%          | 2.13%          | 2.96%    | 7.98% | 0.30%      | 16.57%   | 3.44%         |
| Bioethanol | 0%              | 0.31%          | 0.16%    | 0.16% | 0.16%      | 0.31%    | 0.25%         |
| Lager      | 0%              | 7.00%          | 2.28%    | 0.57% | 0.33%      | 0%       | 0.41%         |
| Probiotic  | 0%              | 0.45%          | 0.68%    | 2.15% | 0%         | 8.50%    | 0.84%         |
| Wine       | 0%              | 0.46%          | 0.37%    | 1.57% | 0%         | 25.97%   | 0.47%         |

335 Table 3. Frequencies of atypical colony morphologies, invasivity and petite mitochondrial  
 336 mutants among the strains, tested after minimal pre-culturing of commercial products.

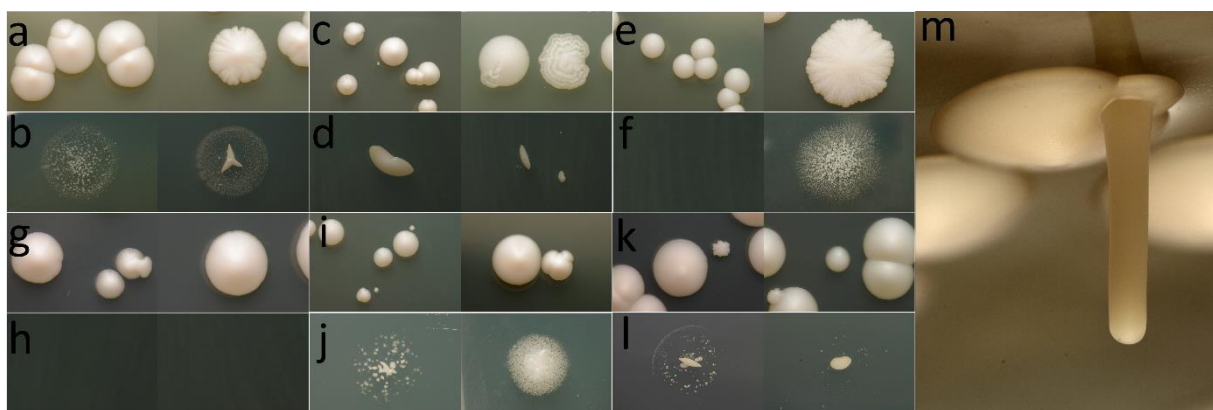

337  
 338 Figure 1. Example colony morphologies (a, c, e, g, i, k, m) and invasivity (or lack of invasive  
 339 growth) after washing colonies off (b, d, f, h, j, l) observed for industrial yeasts. a-b, m:  
 340 ADY\_Baking, note rough colony on right, and variable invasivity phenotype, along with  
 341 stalk-like colony; c-d: Ale, note wrinkled undulate and sectored colonies on right; e-f:  
 342 Bioethanol, note rough invasive colony on right; g-h: Lager, note lack of invasivity; i-j:  
 343 Probiotic, note very small colonies on left; k-l: Wine, note rough undulate colony on left.  
 344 Images not to scale.



345

346 Heterogeneity of typical colonies and influence on stress tolerance

347 After observing heterogeneous colony phenotypes and considerable differences in the  
348 frequencies of abnormal colony phenotypes, we isolated 12 subclone colonies from each  
349 industrial strain that showed entire, circular, smooth-surface colony phenotypes with the  
350 assumption that such regular colonies are the ones most likely to be chosen upon isolation and  
351 establishment of a pure lineage in laboratories working with yeasts, while very small or highly  
352 unusual colonies are consistently avoided. We avoided subculturing (single-cell bottlenecks)  
353 and prolonged culturing of these subclone lineages, and characterized them within weeks of  
354 isolation phenotypically, using the colonies saved at 4°C on YPD plates. Thus, we avoided  
355 preparing stocks and reviving yeasts from stocks as it has geno- and phenotypic consequences  
356 on yeast populations with standing genetic variation (Wing *et al.* 2020). These individual  
357 lineages were subjected to multiplex fingerprinting PCR. All subclone lineages showed  
358 fingerprinting patterns that were identical, or in the case of the ADY\_Baking and Ale yeasts,  
359 identical except for the occasional loss of a single band (out of 12 bands). All strains showed  
360 clearly different patterns from each other, thus, contamination or cross-contamination of the  
361 samples could be excluded and subclone lineages were proven to be derived from the actual  
362 strain (Figure S2.).

363 Spot-plate tests revealed differences in stress tolerance among these subclones lineages  
364 established from regular colonies. Visible differences in growth under various stress  
365 conditions were observed for half of the strains with the spot-plate method, namely, for the  
366 Probiotic, Ale, and ADY\_Baker yeast (Table S1.). In all of these cases, a minority of subclone  
367 lineages (1–3 subclones depending on strain and condition) showed impaired growth under  
368 stress when compared to other subclones or to the original sample that was not subjected to  
369 single-cell bottlenecks.

370 Subsequently, clonal heterogeneity of the six strains during growth on rich and minimal  
371 medium and under stress was also evaluated (using colony area as a proxy to fitness). Clonal  
372 heterogeneity in the form of variable colony sizes in a single sample from a single strain was  
373 prevalent in most samples (Figure 2., S3.). Based on the posterior distributions of residual  
374 variance parameters, the strains showed variable levels of heterogeneity in different  
375 conditions, which was also apparent from the estimated contrast parameters comparing group-



376 level residual variances between groups (Figure S5.). Group-level residual variances of the  
377 measurements estimated with MCMC-GLMM was used to interpret heterogeneity (in this  
378 context, higher variation around the group mean corresponds to higher heterogeneity in the  
379 measured phenotype, *i.e.* the colony areas). Figure S5. shows that clonal heterogeneity under  
380 various growth conditions differs significantly in most cases. That is, when heterogeneities  
381 under different conditions were compared, the strains showed significant differences in all  
382 (Ale, Lager), or all but one (ADY\_Baking, Bioethanol, Probiotic, Wine) of those  
383 comparisons. Thus, for every strain, the level of observable heterogeneity was greatly  
384 dependent on the condition applied, and the ADY\_Baking strain showed the highest  
385 differences across conditions. When we compared group heterogeneities (*i.e.* posterior  
386 distributions of group residual variances) between strain pairs, separately in each condition  
387 (Figure S6.), similarly, the ADY\_Baking strain was the yeast that displayed significantly  
388 higher measures than others in the highest number of cases, e.g. in minimal medium, its  
389 heterogeneity was significantly higher than that of the Ale, Lager, and Bioethanol strain, and  
390 statistically not different from that of the Probiotic and Wine yeast. In rich medium, its  
391 heterogeneity was significantly higher in all but one pairwise comparison (compared to the  
392 Probiotic, its difference was not significant). Under stress conditions (where fewer pairwise  
393 comparisons were made due to different stress conditions applied), the Wine and the  
394 ADY\_Baking strains' heterogeneities were notable. The former showed significantly lower  
395 heterogeneity in three out of four pairwise comparisons, while the latter showed significantly  
396 higher heterogeneity in the same number of comparisons.

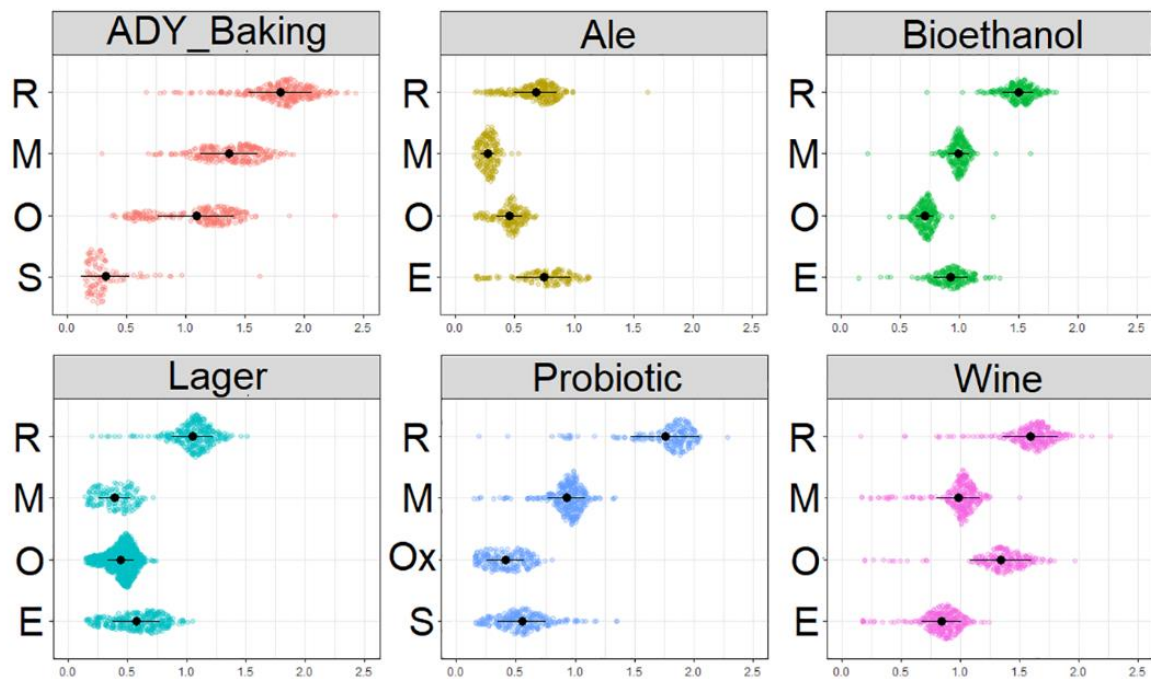

397

398 Figure 2. Clonal heterogeneity: colony area (square-root transformed) distributions under  
399 various conditions for the six commercial samples. R: rich; M: minimal; E: ethanol stress, O:  
400 osmotic stress; S: salt stress; Ox: oxidative stress medium. Black dots represent group means,  
401 black horizontal lines represent standard deviations.

402 Based on these results, the ADY\_Baking yeast and its subclones were subsequently chosen to  
403 further compare how clonal heterogeneity can influence not merely phenotypes but the level  
404 of diversity in cell populations derived from subclones. As described above, this strain  
405 showed considerable differences in subclones' spot plate tests (Table S1.), while it showed  
406 similarities when two stress conditions were compared (Figure S5.). The level of  
407 heterogeneity in the case of subclones and in the original sample under the salt stress  
408 condition was compared at two different time points (4 and 6 d) after inoculation, in the  
409 following manner. First, growth on minimal SD medium was confirmed to be identical for the  
410 subclone lineages using the spot plate method, then the distributions of colony areas were  
411 compared under salt stress (Figure 3.). In most cases, heterogeneity was significantly different  
412 between the original commercial sample (which generally showed weaker stress tolerance  
413 manifesting in generally smaller colonies, but significantly higher heterogeneity) and each of  
414 its subclones, except for subclone B (day 4) and subclones B and J (day 6) when mean  
415 phenotypes (without residuals) were considered (Figure S7.). Regarding residual variances in  
416 colony size distributions, all subclones showed significantly lower heterogeneity compared to

417 the initial commercial sample at both time points except for subclones B, D, and J in the case  
418 of day 4 measurements.

419

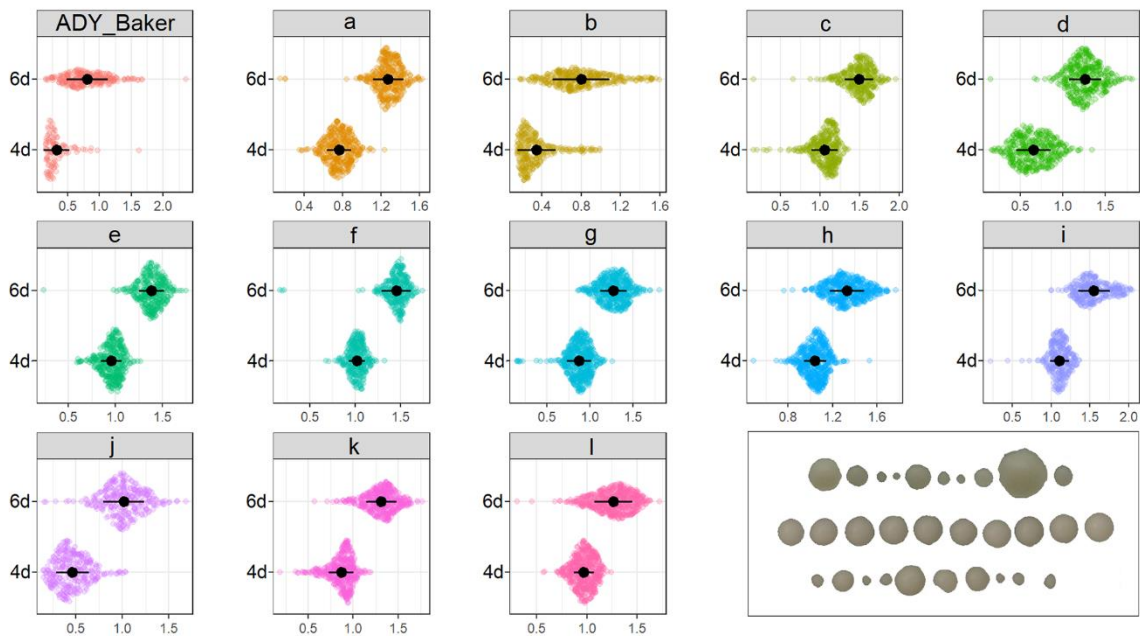

420

421 Figure 3. Clonal heterogeneity both in growth and in the heterogeneity of growth under stress:  
422 colony area (square-root transformed) distributions after 4 and 6 days under salt stress for the  
423 ADY\_Baking sample and its 12 subclones (named a-l). Black dots represent group means,  
424 black horizontal lines represent standard deviations. Inset: illustration of size distributions  
425 with ten randomly chosen colonies on the 6th day of incubation for the ADY\_Baking yeast  
426 (top, note heterogeneity), subclone 'a' (center, note homogeneity), and subclone 'b' (bottom,  
427 note heterogeneity).

428

## 429 Discussion

430 Clonal heterogeneity is a familiar phenomenon for anyone working with culturable microbes.  
431 Single-cell isolates from microbial cultures are routinely obtained for various purposes, e.g.  
432 for subsequent physiological studies, genetic characterization/modification, metabolic  
433 engineering or even for industrial stock propagation, among others, with the advantage of  
434 leveraging a simple visual check for eventual contamination with other microbial species.  
435 Differences in morphology or size among the grown colonies are often observable to the

436 naked eye. Yet, the underlying causes and, perhaps more importantly, the consequences of  
437 single cell bottlenecks (the isolation of a given single-cell colony before an experiment) are  
438 mostly neglected.

439 Studies on the emergence of *de novo* mutations, genome structure variations, and clonal  
440 interference in industrial *Saccharomyces* strains (Voordeckers *et al.* 2015; Zhang *et al.* 2016;  
441 Bellon *et al.* 2018; Mangado *et al.* 2018; Gorter De Vries *et al.* 2019; Sampaio, Watson and  
442 Argueso 2019; Gibson *et al.* 2020; Lairón-Peris *et al.* 2020) have led to increased  
443 understanding on their adaptation. In comparison, relatively few yeast studies have been  
444 devoted to the importance of clonal heterogeneity in adaptation (e.g. Holland *et al.* 2014; Bódi  
445 *et al.* 2017; Vázquez-García *et al.* 2017) or to understanding how epigenetics, gene expression  
446 noise, metabolic state, unequal cell division, chronological or replicative age differences, or  
447 prions cause yeast populations to be heterogeneous (Halfmann *et al.* 2012; Ackermann 2015;  
448 Adamczyk *et al.* 2016; Cerulus *et al.* 2016; Dubeau *et al.* 2018). The latter study areas, to our  
449 knowledge, exclusively focus on lab strains and not on industrial ones.

450 Among the factors mentioned above, *de novo* mutations and GSVs can result in heritable  
451 differences among subclone lineages (while other mentioned mechanisms cause constant cell-  
452 to-cell heterogeneity without genetic heritability in the strict sense). However, studies  
453 comparing *Saccharomyces* strains rarely address the „founder effect” of using a subclone  
454 lineage of a strain (due to methodological constraints) to characterize the strain itself. Only a  
455 few studies have focused on heterogeneous subclone lineages as well as cryptic variation of  
456 the PE-2 Bioethanol strain or its derivative JAY270 (Reis *et al.* 2014; Rodrigues-Prause *et al.*  
457 2018; Sampaio, Watson and Argueso 2019) and those of the Lager W34/70 strain (Bolat,  
458 Walsh and Turtoi 2008; van den Broek *et al.* 2015), while in most other cases, strains are used  
459 interchangeably with subclone lineages. In fact, the commonly used and well-known  
460 tetraploid Ale strain of our study, has been sequenced and analyzed by three recent studies, all  
461 of which found different karyotypes due to apparent genotypic heterogeneity of the given  
462 subclone lineages studied by each (Table 2., Figure S1.). In the case of the tetraploid  
463 ADY\_Baking active dry yeast, we could identify excessive karyotype heterogeneity within a  
464 single batch of the yeast, which may either be caused by meiotic or mitotic processes.  
465 Karyotype changes are important as they are known to be adaptive (Gilchrist and Stelkens  
466 2019) and may even influence cell and colony morphology (Tan *et al.* 2013), and stress  
467 adaptations not only in industrial strains (e.g. Kadowaki *et al.* 2017; Morard *et al.* 2019), but  
468 in pathogenic *Saccharomyces* as well (Raghavan, Aquadro and Alani 2019).

469 It must be noted that in the case of pathogenic yeast species, the existence of genotypically  
470 different subclone lineages of strains is more often taken into account in the context of  
471 comparability among labs (e.g. Franzot *et al.* 1998; Abbey *et al.* 2014) or in the context of  
472 heteroresistance to antimycotics (Stone *et al.* 2019). As clinical *Saccharomyces* isolates are  
473 regularly derived from commercial (baking and probiotic) yeasts (Pfliegler *et al.* 2017; Imre  
474 *et al.* 2019), the clonal heterogeneity inside yeast products should be taken more often into  
475 account, when the goal is to understand how stress resistance of industrial yeasts translates  
476 into colonizing and pathogenic potential. For example, in a recent study, we compared  
477 commercial and clinical yeasts, but did not test multiple subclone lineages of a given strain  
478 (Pfliegler *et al.* 2017), a fact that may have influenced our observations due to founder effects.

479 Based on the facts that genotypic heterogeneity is widespread, especially in tetraploid and  
480 hybrid lineages, and that the relatively long (Large *et al.* 2020) industrial yeast cultivations  
481 may already be considered a stressful selective environment (Qiu *et al.* 2019), here we  
482 designed experiments to quantify and compare heterogeneity in industrial, commercially  
483 obtained yeasts. It must be noted that the PE-2 Bioethanol strain was obtained from a culture  
484 collection for the phenotyping tets (while its sequenced subclones originated from a  
485 commercial product) and thus did not go through extensive culturing before packaging in the  
486 form of a yeast product. We found an immense heterogeneity in several cases when colony  
487 morphologies and invasivity were assessed inside single batches of one strain (Figure 1.,  
488 Table 3.). Besides rough, wrinkled, and very small colonies, two other observable types are  
489 especially interesting. Sectored colonies are themselves naturally arising illustrations of clonal  
490 heterogeneity and interference (when lineages inside the colony compete for space as the  
491 colony grows), and the fact that in merely 10 days of incubation, sectored colonies were as  
492 common as ~2% and ~3% in the Lager and Ale strains, respectively, shows that the  
493 emergence of heterogeneous subclone lineages is more of a rule than an exception. The  
494 second remarkable colony phenotype was the stalk-like growth previously described and  
495 linked to craters in the agar surface by two studies with *Saccharomyces* (Engelberg *et al.*  
496 1998; Scherz, Shinder and Engelberg 2001).

497 After assessing heterogeneity of single-cell colonies in our strains, we assumed that in routine  
498 microbiological workflow, unusual colonies are usually avoided when a pure lineage is to be  
499 established. Thus, we obtained 12 subclone lineages that did not show altered morphologies  
500 and subsequently showed that even these seemingly uniform lineages can be heterogeneous in  
501 their fitness under various stresses (Table S1.). Subsequently, the simple plating method used

502 by us decoupled fitness from clonal interference by isolating cells to form hundreds of distant  
503 colonies, enabling the simultaneous study of high- and very low fitness subclone lineages at a  
504 given timepoint within a strain or within a subclone lineage. By applying MCMC-GLMM  
505 statistic modelling to such single-cell colony measurements, we showed that each strain is  
506 different in the level of heterogeneity, while a single strain may also display different levels of  
507 heterogeneity depending on the condition (Figure S5-6.). Finally, we also showed that  
508 subclone lineages do not only differ in their phenotypes, but can also be significantly different  
509 in their potential to generate clonal heterogeneity (Figure S7.). Although we haven't  
510 determined the relative contributions of genetic, epigenetic, or cell age factors affecting  
511 heterogeneity, our experimental design of phenotyping (started from overnight cultures on  
512 rich media and being evaluated after days of growth on agar media) plausibly strongly  
513 suppressed all but the heritable genetic factors. Additionally, the separate growth of colonies  
514 on agar media eliminated clonal interference on the test media, enabling the observation of  
515 very low fitness lineages emerging from a given strain or a given subclone (Figure 4.).

516 Interestingly, when cells are propagated to be used in an industrial process, these initial  
517 propagation conditions can be rather different from the conditions under which the process  
518 per se is carried out. Whereas the initial propagation steps have the aim of increasing the  
519 microbial population, the process has the aim of generating as much of the product as possible  
520 (best TRY compromise; T = Titer, R = rate, Y = yield). Thus, the selective pressure during the  
521 propagation step might not only be rather different, but even somehow unfavorable, from the  
522 selective pressure during the process itself, i.e. propagation might select subclones that are  
523 may not be the best ones for the process.

524 In conclusion, our experimental setup, to the best of our knowledge, is the first that shows  
525 that: 1) clonal heterogeneity is widespread in various clades of commercial yeasts as a  
526 presumed consequence of microevolution during the stressful conditions of industrial cell  
527 propagation; 2) this heterogeneity affects observable colony morphologies, invasivity, and  
528 stress tolerance; and 3) heterogeneity in subsequent generations of a yeast culture is also  
529 greatly dependent on which subclone an experiment is based on (summarized in Figure 4.).  
530 The surprisingly complex heterogeneity of industrial strains should be taken into account in  
531 pheno- and genotyping studies, as well as in strain improvement strategies.



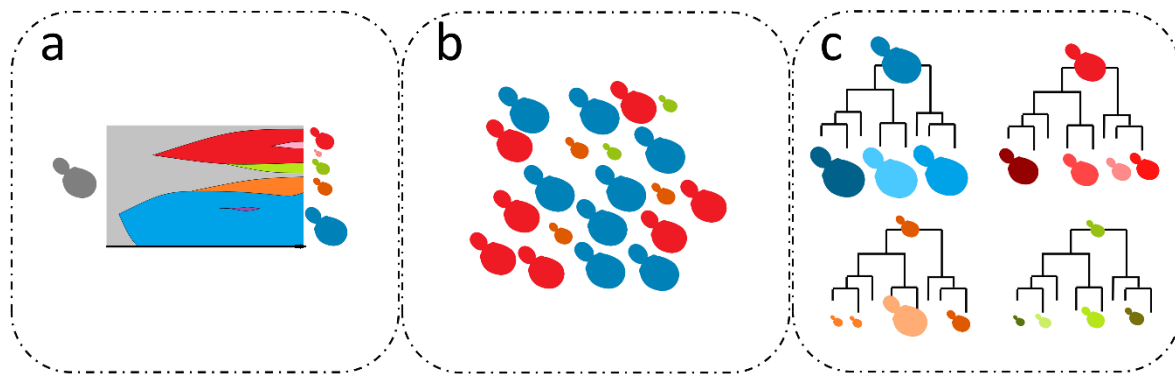

532

533 **Figure 4.** Proposed model of the origin and consequences of clonal heterogeneity in  
534 commercial *Saccharomyces* yeasts. a: a stock culture (grey) is used as an inoculum to initiate  
535 production, leading to large amounts of cells grown over the course of days (x axis). Subclone  
536 lineages (in red, pink, green, orange, and blue) emerge due to genome instability and  
537 mutations, compete under (clonal interference) and are selected by stress factors, resulting in  
538 changing frequencies of the lineages, as represented on the y axis. b: a final product that  
539 contains a heterogeneous yeast population with various frequencies of subclone lineages  
540 (clonal heterogeneity). c: subsequent experimental results with single-cell derived subclone  
541 lineages lead to a founder effect in the form of different phenotypes and different variability.  
542 Colored yeast figure sizes refer to variable fitness, frequency of colors refers to frequency of  
543 various lineages in yeast products.

544

#### 545 **Acknowledgements**

546 The research is supported by the project “Establishing a scale-independent complex precision  
547 consultancy system (GINOP-2.2.1-15-2016-00001)”. We acknowledge support from the  
548 Higher Education Institutional Excellence Program (NKFIH-1150-6/2019) of the Ministry of  
549 Innovation and Technology in Hungary, within the framework of the Biotechnology thematic  
550 program of the University of Debrecen. A.I. was supported by the ÚNKP-19-3-I-234 New  
551 National Excellence Program of the Ministry of Human Capacities of Hungary. W.P.P. was  
552 supported by a Fulbright Research Award from the Hungarian-American Fulbright  
553 Commission. We are deeply grateful for Michael M. Desai, Harvard University, for enabling  
554 the genomic sequencing of the three PE-2 clones and agreeing with sharing the corresponding  
555 data.



556

557 **References**

558 Abbey DA, Funt J, Lurie-Weinberger MN *et al.* YMAP: a pipeline for visualization of copy  
559 number variation and loss of heterozygosity in eukaryotic pathogens. *Genome Med*  
560 2014;**6**:100.

561 Ackermann M. A functional perspective on phenotypic heterogeneity in microorganisms. *Nat*  
562 *Rev Microbiol* 2015;**13**:497–508.

563 Adamczyk J, Deregowska A, Panek A *et al.* Affected chromosome homeostasis and genomic  
564 instability of clonal yeast cultures. *Curr Genet* 2016;**62**:405–18.

565 Van der Auwera GA, Carneiro MO, Hartl C *et al.* From fastQ data to high-confidence variant  
566 calls: The genome analysis toolkit best practices pipeline. *Curr Protoc Bioinforma*  
567 2013;**43**:11.10.1-11.10.33.

568 Barbosa R, Pontes A, Santos RO *et al.* Multiple rounds of artificial selection promote microbe  
569 secondary domestication - The case of cachaça yeasts. *Genome Biol Evol* 2018;**10**:1939–  
570 55.

571 Baym M, Kryazhimskiy S, Lieberman TD *et al.* Inexpensive multiplexed library preparation  
572 for megabase-sized genomes. *PLoS One* 2015;**10**:e0128036.

573 Bellon JR, Ford CM, Borneman AR *et al.* A novel approach to isolating improved industrial  
574 interspecific wine yeasts using chromosomal mutations as potential markers for  
575 increased fitness. *Front Microbiol* 2018;**9**:1442.

576 Blundell JR, Schwartz K, Francois D *et al.* The dynamics of adaptive genetic diversity during  
577 the early stages of clonal evolution. *Nat Ecol Evol* 2018:1.

578 Bódi Z, Farkas Z, Nevozhay D *et al.* Phenotypic heterogeneity promotes adaptive evolution.  
579 *PLoS Biol* 2017;**15**:1–26.

580 Bolat I, Walsh MC, Turtoi M. Isolation and characterization of two new lager yeast strains  
581 from the WS34/70 population. *Roum Biotechnol Lett* 2008;**13**:62–73.

582 Borneman AR, Forgan AH, Kolouchova R *et al.* Whole genome comparison reveals high

- 583 levels of inbreeding and strain redundancy across the spectrum of commercial wine  
584 strains of *Saccharomyces cerevisiae*. *G3 Genes, Genomes, Genet* 2016;**6**:957–71.
- 585 van den Broek M, Bolat I, Nijkamp JF *et al*. Chromosomal copy number variation in  
586 *Saccharomyces pastorianus* is evidence for extensive genome dynamics in industrial  
587 lager brewing strains. *Appl Environ Microbiol* 2015;**81**:6253–67.
- 588 Brzozowska B, Gałeczki M, Tartas A *et al*. Freeware tool for analysing numbers and sizes of  
589 cell colonies. *Radiat Environ Biophys* 2019;**58**:109–17.
- 590 Cerulus B, New AM, Pougach K *et al*. Noise and epigenetic inheritance of single-cell division  
591 times influence population fitness. *Curr Biol* 2016;**26**:1138–47.
- 592 Chen S, Zhou Y, Chen Y *et al*. fastp: an ultra-fast all-in-one FASTQ preprocessor.  
593 *Bioinformatics* 2018;**34**:i884–90.
- 594 Ciani M, Capece A, Comitini F *et al*. Yeast interactions in inoculated wine fermentation.  
595 *Front Microbiol* 2016;**7**:555.
- 596 Duan S-F, Han P-J, Wang Q-M *et al*. The origin and adaptive evolution of domesticated  
597 populations of yeast from Far East Asia. *Nat Commun* 2018;**9**:2690.
- 598 Duveau F, Hodgins-Davis A, Metzger BP *et al*. Fitness effects of altering gene expression  
599 noise in *Saccharomyces cerevisiae*. *Elife* 2018;**7**, DOI: 10.7554/eLife.37272.
- 600 Engelberg D, Mimran A, Martinetto H *et al*. Multicellular stalk-like structures in  
601 *Saccharomyces cerevisiae*. *J Bacteriol* 1998;**180**:3992–6.
- 602 Eyler E. Pouring agar plates and streaking or spreading to isolate individual colonies. *Methods*  
603 *in Enzymology*. Vol 533. Academic Press, 2013, 3–14.
- 604 Fay JC, Liu P, Ong GT *et al*. A polyploid admixed origin of beer yeasts derived from  
605 European and Asian wine populations. Gore J (ed.). *PLOS Biol* 2019;**17**:e3000147.
- 606 Franzot SP, Mukherjee J, Cherniak R *et al*. Microevolution of a standard strain of  
607 *Cryptococcus neoformans* resulting in differences in virulence and other phenotypes.  
608 *Infect Immun* 1998;**66**:89–97.
- 609 Gallone B, Steensels J, Mertens S *et al*. Interspecific hybridization facilitates niche adaptation

- 610 in beer yeast. *Nat Ecol Evol* 2019;**3**:1562–75.
- 611 Gallone B, Steensels J, Prah T *et al.* Domestication and divergence of *Saccharomyces*  
612 *cerevisiae* beer yeasts. *Cell* 2016;**166**:1397-1410.e16.
- 613 Gibson B, Dahabieh M, Krogerus K *et al.* Adaptive laboratory evolution of ale and lager  
614 yeasts for improved brewing efficiency and beer quality. *Annu Rev Food Sci Technol*  
615 2020;**11**:23–44.
- 616 Gibson BR, Lawrence SJ, Leclaire JPR *et al.* Yeast responses to stresses associated with  
617 industrial brewery handling. *FEMS Microbiol Rev* 2007;**31**:535–69.
- 618 Gilchrist C, Stelkens R. Aneuploidy in yeast: Segregation error or adaptation mechanism?  
619 *Yeast* 2019;**36**:525–39.
- 620 Gonçalves M, Pontes A, Almeida P *et al.* Distinct domestication trajectories in top-fermenting  
621 beer yeasts and wine yeasts. *Curr Biol* 2016;**26**:2750–61.
- 622 Gorter de Vries AR, Knibbe E, van Roosmalen R *et al.* Improving industrially relevant  
623 phenotypic traits by engineering Chromosome Copy Number in *Saccharomyces*  
624 *pastorianus*. *Front Genet* 2020;**11**:518.
- 625 Gorter De Vries AR, Voskamp MA, Van Aalst ACA *et al.* Laboratory evolution of a  
626 *Saccharomyces cerevisiae* × *S. eubayanus* hybrid under simulated lager-brewing  
627 conditions. *Front Genet* 2019;**10**, DOI: 10.3389/fgene.2019.00242.
- 628 Hadfield JD. MCMC methods for multi-response generalized linear mixed models: The  
629 MCMCglmm R package. *J Stat Softw* 2010;**33**:1–22.
- 630 Halfmann R, Jarosz DF, Jones SK *et al.* Prions are a common mechanism for phenotypic  
631 inheritance in wild yeasts. *Nature* 2012;**482**:363–8.
- 632 Hanna M, Xiao W. Isolation of nucleic acids. *Methods Mol Biol* 2006;**313**:15–20.
- 633 Holland SL, Reader T, Dyer PS *et al.* Phenotypic heterogeneity is a selected trait in natural  
634 yeast populations subject to environmental stress. *Environ Microbiol* 2014;**16**:1729–40.
- 635 Imre A, Rácz HV, Antunovics Z *et al.* A new, rapid multiplex PCR method identifies frequent  
636 probiotic origin among clinical *Saccharomyces* isolates. *Microbiol Res*

- 637           2019;**227**:126298.
- 638   Kadowaki M, Fujimaru Y, Taguchi S *et al.* Chromosomal aneuploidy improves the brewing  
639       characteristics of sake yeast. *Appl Environ Microbiol* 2017;**83**, DOI:  
640       10.1128/AEM.01620-17.
- 641   Lairón-Peris M, Pérez-Través L, Muñiz-Calvo S *et al.* Differential contribution of the parental  
642       genomes to a *S. cerevisiae* × *S. uvarum* hybrid, inferred by phenomic, genomic, and  
643       transcriptomic analyses, at different industrial stress conditions. *Front Bioeng Biotechnol*  
644       2020;**8**:129.
- 645   Lang GI, Botstein D, Desai MM. Genetic variation and the fate of beneficial mutations in  
646       asexual populations. *Genetics* 2011;**188**:647–61.
- 647   Langdon QK, Peris D, Baker EP *et al.* Fermentation innovation through complex  
648       hybridization of wild and domesticated yeasts. *Nat Ecol Evol* 2019 311 2019;**3**:1576–86.
- 649   Large CRL, Hanson NA, Tsouris A *et al.* Genomic stability and adaptation of beer brewing  
650       yeasts during serial repitching in the brewery. *bioRxiv* 2020:2020.06.26.166157.
- 651   Legras J-L, Merdinoglu D, Cornuet J-M *et al.* Bread, beer and wine: *Saccharomyces*  
652       *cerevisiae* diversity reflects human history. *Mol Ecol* 2007;**16**:2091–102.
- 653   Li H, Durbin R. Fast and accurate short read alignment with Burrows-Wheeler transform.  
654       *Bioinformatics* 2009;**25**:1754–60.
- 655   Li H, Handsaker B, Wysoker A *et al.* The Sequence Alignment/Map format and SAMtools.  
656       *Bioinformatics* 2009;**25**:2078–9.
- 657   Magwene PM. Revisiting Mortimer’s Genome Renewal Hypothesis: Heterozygosity,  
658       homothallism, and the potential for adaptation in yeast. *Adv Exp Med Biol* 2014;**781**:37–  
659       48.
- 660   Mangado A, Morales P, Gonzalez R *et al.* Evolution of a yeast with industrial background  
661       under winemaking conditions leads to diploidization and chromosomal copy number  
662       variation. *Front Microbiol* 2018;**9**:1816.
- 663   McDonald MJ, Rice DP, Desai MM. Sex speeds adaptation by altering the dynamics of

- 664 molecular evolution. *Nature* 2016;**531**:233–6.
- 665 Morard M, Macías LG, Adam AC *et al.* Aneuploidy and ethanol tolerance in *Saccharomyces*  
666 *cerevisiae*. *Front Genet* 2019;**10**:82.
- 667 Mortimer RK. Evolution and variation of the yeast (*Saccharomyces*) genome. *Genome Res*  
668 2000;**10**:403–9.
- 669 Offei B, Vandecruys P, De Graeve S *et al.* Unique genetic basis of the distinct antibiotic  
670 potency of high acetic acid production in the probiotic yeast *Saccharomyces cerevisiae*  
671 var. *boulardii*. *Genome Res* 2019;**29**:1478–94.
- 672 Okuno M, Kajitani R, Ryusui R *et al.* Next-generation sequencing analysis of lager brewing  
673 yeast strains reveals the evolutionary history of interspecies hybridization. *DNA Res*  
674 2016;**23**:dsv037.
- 675 Payen C, Sunshine AB, Ong GT *et al.* High-throughput identification of adaptive mutations in  
676 experimentally evolved yeast populations. *PLOS Genet* 2016;**12**:e1006339.
- 677 Peter J, De Chiara M, Friedrich A *et al.* Genome evolution across 1,011 *Saccharomyces*  
678 *cerevisiae* isolates. *Nature* 2018;**556**:339–44.
- 679 Pfliegler WP, Boros E, Pázmándi K *et al.* Commercial strain-derived clinical *Saccharomyces*  
680 *cerevisiae* can evolve new phenotypes without higher pathogenicity. *Mol Nutr Food Res*  
681 2017;**61**:1601099.
- 682 Pontes A, Hutzler M, Brito PH *et al.* Revisiting the taxonomic synonyms and populations of  
683 *Saccharomyces cerevisiae* — Phylogeny, phenotypes, ecology and domestication.  
684 *Microorganisms* 2020;**8**:903.
- 685 Poplin R, Ruano-Rubio V, DePristo MA *et al.* Scaling accurate genetic variant discovery to  
686 tens of thousands of samples. *bioRxiv* 2018:201178.
- 687 Qiu X, Zhang J, Zhou J *et al.* Stress tolerance phenotype of industrial yeast: industrial cases,  
688 cellular changes, and improvement strategies. *Appl Microbiol Biotechnol*  
689 2019;**103**:6449–62.
- 690 R Core Team. R: A language and environment for statistical computing. 2020.

- 691 Raghavan V, Aquadro CF, Alani E. Baker's yeast clinical isolates provide a model for how  
692 pathogenic yeasts adapt to stress. *Trends Genet* 2019;**35**:804–17.
- 693 Reis VR, Bassi APG, da Silva JCG *et al.* Characteristics of *Saccharomyces cerevisiae* yeasts  
694 exhibiting rough colonies and pseudohyphal morphology with respect to alcoholic  
695 fermentation. *Brazilian J Microbiol* 2014;**44**:1121–31.
- 696 Rodrigues-Prause A, Sampaio NMV, Gurol TM *et al.* A case study of genomic instability in  
697 an industrial strain of *Saccharomyces cerevisiae*. *G3 Genes, Genomes, Genet*  
698 2018;**8**:3703–13.
- 699 Rueden CT, Schindelin J, Hiner MC *et al.* ImageJ2: ImageJ for the next generation of  
700 scientific image data. *BMC Bioinformatics* 2017;**18**:529.
- 701 Salazar AN, Gorter de Vries AR, van den Broek M *et al.* Nanopore sequencing and  
702 comparative genome analysis confirm lager-brewing yeasts originated from a single  
703 hybridization. *BMC Genomics* 2019;**20**:916.
- 704 Sampaio NMV, Watson RA, Argueso JL. Controlled reduction of genomic heterozygosity in  
705 an industrial yeast strain reveals wide cryptic phenotypic variation. *Front Genet*  
706 2019;**10**:782.
- 707 Scannell DR, Zill OA, Rokas A *et al.* The awesome power of yeast evolutionary genetics:  
708 New genome sequences and strain resources for the *Saccharomyces sensu stricto* genus.  
709 *G3* 2011;**1**:11–25.
- 710 Scherz R, Shinder V, Engelberg D. Anatomical analysis of *Saccharomyces cerevisiae* stalk-  
711 like structures reveals spatial organization and cell specialization. *J Bacteriol*  
712 2001;**183**:5402–13.
- 713 Steensels J, Gallone B, Voordeckers K *et al.* Domestication of industrial microbes. *Curr Biol*  
714 2019;**29**:R381–93.
- 715 Stone NRH, Rhodes J, Fisher MC *et al.* Dynamic ploidy changes drive fluconazole resistance  
716 in human cryptococcal meningitis. *J Clin Invest* 2019, DOI: 10.1172/JCI124516.
- 717 Strobe PK, Skelly DA, Kozmin SG *et al.* The 100-genomes strains, an *S. cerevisiae* resource  
718 that illuminates its natural phenotypic and genotypic variation and emergence as an

- 719           opportunistic pathogen. *Genome Res* 2015;**125**:762–74.
- 720   Tan Z, Hays M, Cromie GA *et al.* Aneuploidy underlies a multicellular phenotypic switch.  
721           *Proc Natl Acad Sci* 2013;**110**:12367–72.
- 722   Tattini L, Tellini N, Mozzachiodi S *et al.* Accurate tracking of the mutational landscape of  
723           diploid hybrid genomes. *Mol Biol Evol* 2019;**36**:2861–77.
- 724   Vázquez-García I, Salinas F, Li J *et al.* Clonal heterogeneity influences the fate of new  
725           adaptive mutations. *Cell Rep* 2017;**21**:732–44.
- 726   Voordeckers K, Kominek J, Das A *et al.* Adaptation to high ethanol reveals complex  
727           evolutionary pathways. *PLoS Genet* 2015;**11**:e1005635.
- 728   Wing KM, Phillips MA, Baker AR *et al.* Consequences of cryopreservation in diverse natural  
729           isolates of *Saccharomyces cerevisiae*. *Genome Biol Evol* 2020, DOI:  
730           10.1093/gbe/evaa121.
- 731   Yue J-X, Li J, Aigrain L *et al.* Contrasting evolutionary genome dynamics between  
732           domesticated and wild yeasts. *Nat Genet* 2017;**49**:913–24.
- 733   Zhang K, Zhang LJ, Fang YH *et al.* Genomic structural variation contributes to phenotypic  
734           change of industrial bioethanol yeast *Saccharomyces cerevisiae*. *FEMS Yeast Res*  
735           2016;**16**:1–12.
- 736   Zhu YO, Sherlock G, Petrov DA. Whole genome analysis of 132 clinical *Saccharomyces*  
737           *cerevisiae* strains reveals extensive ploidy variation. *G3* 2016;**6**:2421–34.
